# Supplementary material
Source: Elsevier journal article supplement (https://www.sciencedirect.com/science/article/pii/S0120563320301066)
Supplement: mmc1 [file S0120563320301066:mmc1.docx]

**Anexos**

**Tabla 1** Diagnósticos clínicos para diagnóstico de miocarditis

| **Presentación clínica** |
| --- |
| - Dolor torácico agudo, pericárdico o pseudoisquémico - Nuevo inicio (días a 3 meses) o empeoramiento de disnea en ejercicio o reposo o fatiga, con o sin signos de falla cardíaca - Inicio crónico/subagudo (> 3 meses) o empeoramiento de disnea en ejercicio o reposo o fatiga, con o sin signos de falla cardíaca - Palpitaciones o síntomas de arritmia inexplicados, síncope o muerte súbita abortada - Shock cardiogénico inexplicado |
| **Criterios diagnósticos** |
| 1. EKG/Holter/prueba de estrés   Resultados anormales en EKG, Holter o prueba de estrés con cualquiera de los siguientes: bloqueo de I a III grado, cambios en segmento/onda ST/T, pausa sinusal, taquicardia ventricular o fibrilación auricular, reducción altura onda R, retraso en conducción intraventricular, ondas Q, bajo voltaje, latidos prematuros, taquicardia supraventricular |
| 1. Marcadores elevados: TnT, TnI |
| 1. Anormalidades estructurales o funcionales en imagen cardíaca (ECO, angio, RM)   Anormalidades estructurales o funcionales de novo en ventrículo izquierdo o derecho: alteraciones en motilidad de pared, anormalidades en función diastólica o función sistólica global, con o sin dilatación ventricular, con o sin aumento de grosor de ventrículo, con o sin efusión pericárdica, con o sin trombos intracavitarios. |
| 1. Caracterización de tejido por RM   Edema o LGE de patrón miocárdico clásico |

Sospecha clínica de miocarditis si: > 1 criterio diagnóstico clínico y más de 1 criterio de las diferentes categorías en ausencia de enfermedad coronaria significativa (> 50 % de estenosis), o de condición cardiovascular preexistente o enfermedad extra cardíaca que pueda explicar el síndrome

**Tabla 2** Características de los pacientes.

| **No** | **Autor** | **Año** | **Edad** | **Sexo** | **Método diagnóstico** | **Microorganismo** | **Síntomas** | **Alteraciones en el EKG** | **Biomarcador** | **Muerte** |
| --- | --- | --- | --- | --- | --- | --- | --- | --- | --- | --- |
| 1 | Hennigar *et al*.21 | 1953 | 2 | M | Aglutinación | *Salmonella no typhi* | Fiebre, diarrea, vómito, anorexia, hepatomegalia y esplenomegalia, adenopatías | No reporte | No reporte | Sí |
| 2 | Rosenberg *et al.*22 | 1964 | 3 | F | Biopsia | *Klebsiella pneumoniae* | No reporte | No reporte | NE | Sí |
| 3 | Sanders *et al.*23 | 1964 | 62 | F | Hemocultivos | *Salmonella choleraesuis* | Disnea, dolor torácico, anorexia, diarrea | Aplanamiento de ondas T | No reporte | Sí |
| 4 | Langaker *et al.*24 | 1973 | 76 | M | Hemocultivos – coprocultivo | *Salmonella typhimurium* | Diarrea, vértigo, confusión | Ondas T negativas precordiales. Disociación AV | No reporte | Sí |
| 5 | Simonsen *et al.*25 | 1980 | 24 | M | Contenido colónico autopsia | *Salmonella typhimurium* | Diarrea, náuseas | No reporte | No reporte | Sí |
| 6 | Götz *et al.*26 | 1983 | 53 | M | Hemocultivo | *Salmonella typhi murium* | Fiebre, dolor abdominal | Disminución voltaje, onda T aplanada | NE | Sí |
| 7 | Burt *et al.*27 | 1990 | 29 | M | Hemocultivos | *Salmonella heidelberg* | Diarrea, dolor abdominal, muerte súbita | Fibrilación ventricular | No reporte | Sí |
| 8 | Rubesteins JS *et al.*28 | 1993 | 8 | F | Coprocultivo | *Shigella sonnei* | Letargia, cefalea, fiebre, emesis y diarrea | Ectopia ventricular prematura con disminución del voltaje | NE | No |
| 9 | Rubesteins JS *et al.*28 | 1993 | 10 | F | Cultivo de aspirado gástrico | *Shigella sonnei* | Diarrea, cefalea, fiebre | Bloqueo de segundo grado intermitente | NE | No |
| 10 | Leon F *et al.*29 | 1997 | 59 | M | Coprológico | *Vibrio cholera* | Diarrea, náuseas, vómito | Bloqueo trifascicular: Bloqueo AV primer grado, bloqueo completo rama derecha, hemibloqueo postero inferior izquierdo | CPK elevada | No |
| 11 | Johnson JS *et al.*30 | 1998 | 83 | M | Urocultivo | *Serratia marcescens* | Disnea, ortopnea | NE | NE | Si |
| 12 | Neuwirth C, et al.31 | 1999 | 1 mes | M | Biopsia de miocardio | *Salmonella virchow* | Fiebre, muerte súbita | NE | NE | Si |
| 13 | Cox ID *et al.*32 | 2000 | 32 | M | Coprocultivo | *Campylobacter jejuni* | Diarrea, disnea, dolor torácico | Ritmo atrial bajo, inversión simétrica de onda T en V4 – V6, DI y AVL | CPK elevada | No |
| 14 | Ma M, *et al.*33 | 2007 | 23 | F | Biopsia de miocardio | *Clostridium novyi* | Dolor torácico, escalofríos | Bloqueo de rama derecha, infradesnivel ST difuso | CPK elevada | Si |
| 15 | Turpie DF *et al.*34 | 2009 | 45 | M | Coprocultivo | *Campylobacter Jejuni* | Diarrea, emesis, fiebre | Fibrilación auricular con elevación del ST en cara anterolateral | Troponina elevada | No |
| 16 | Heinzl B et al.35 | 2010 | 17 | M | Coprocultivo | *Campylobacter jejuni* | Fiebre, diarrea, dolor torácico | Elevación del ST en DI, AVL, V4 y V5 | Troponina elevada | No |
| 17 | Hibbert B *et al.*36 | 2010 | 25 | M | Hemocultivo | *Salmonella enteritidis* | Diarrea, fiebre, escalofríos, dolor torácico, muerte súbita | Elevación del ST en DII, DIII, AVF, V5 – V6 | Troponina elevada | No |
| 18 | Kratzer C *et al.*37 | 2010 | 19 | M | Coprocultivo | *Campylobacter Jejuni* | Dolor abdominal, náuseas, diarrea | Taquicardia sinusal | Troponina elevada | No |
| 19 | Fica A *et al.*38 | 2012 | 17 | M | Cultivo para *Campylobacter* (Medio microaerófilo a T: 42C) | *Campylobacter Jejuni* | Dolor abdominal, diarrea, fiebre | Elevación del ST en V1 – V6 | CPK elevada | No |
| 20 | De Cock D *et al.*38 | 2012 | 34 | M | Coprocultivo | *Campylobacter Jejuni* | Diarrea, emesis | Elevación del ST en V4 – V6 | Troponina elevada | No |
| 21 | De Cock D *et al.*39 | 2012 | 21 | M | Coprocultivo | *Campylobacter Jejuni* | Diarrea, fiebre | Elevación del ST en V4 – V6 | CPK elevada | No |
| 22 | Brice J *et al.*40 | 2013 | 16 | M | Coprocultivo | *Salmonella enteritidis* | Diarrea, fiebre, escalofríos, dolor torácico | Bloqueo incompleto de rama derecha | Troponina elevada | No |
| 23 | Panikkath R *et al.*41 | 2014 | 43 | M | ELISA | *Campylobacter Jejuni* | Diarrea | Ritmo sinusal, normal | Troponina elevada | No |
| 24 | Villablanca P *et al.*15 | 2015 | 19 | M | Coprocultivo | *Salmonella berta* | Fiebre, escalofríos, diarrea, dolor abdominal, disnea, dolor torácico | Depresión del segmento ST en V1, V2, elevación en V5 y V6 | Troponina elevada | No |
| 25 | Gutiérrez de la Varga *et al.*42 | 2017 | 55 | M | Coprocultivo | *Campylobacter Jejuni* | Diarrea, dolor abdominal, dolor torácico | Alteración del ST difuso | Troponina elevada | No |
| 26 | Sundbom *et al.*43 | 2018 | 22 | M | Coprocultivo | *Salmonella enteritidis* | Fiebre, dolor abdominal, diarrea, hematoquecia, dolor torácico | Elevación del ST en cara anterior | Troponina elevada | No |
| 27 | Greefield GM *et al.*44 | 2018 | 31 | M | Coprocultivo | *Campylobacter Jejuni* | Diarrea, fiebre, mialgias, letargia, dolor torácico. | Ritmo sinusal, normal | Troponina elevada | No |

**Tabla 3** Métodos imagenológicos

| **No** | **Autor** | **Año** | **Edad** | **Sexo** | **Arteriografía** | **Ecocardiograma** | **Resonancia magnética** | **Patología con confirmación de miocarditis** |
| --- | --- | --- | --- | --- | --- | --- | --- | --- |
| 1 | Hennigar *et al.*21 | 1953 | 2 | M | No | No | No | Sí |
| 2 | Rosenberg *et al.*22 | 1964 | 3 | F | No | No | No | Sí |
| 3 | Sanders *et al.*23 | 1964 | 62 | F | No | No | No | Sí |
| 4 | Langaker *et al.*24 | 1973 | 76 | M | No | No | No | Sí |
| 5 | Simonsen *et al.*25 | 1980 | 24 | M | No | No | No | Sí |
| 6 | Götz *et al.*26 | 1983 | 53 | M | No | No | No | Sí |
| 7 | Burt *et al.*27 | 1990 | 29 | M | No | No | No | Sí |
| 8 | Rubesteins JS *et al.*28 | 1993 | 8 | F | No | FEVI 20 %, pobre contractilidad del ventrículo izquierdo | No | Sí |
| 9 | Rubesteins JS *et al.*28 | 1993 | 10 | F | No | Trombo mural biventricular | No | Sí |
| 10 | León F *et al*. | 1997 | 59 | M | Normal | FEVI 30 %. Hipoquinesia generalizada moderada en todas las secciones de las paredes de los dos ventrículos. Control: pericarditis aguda con FE y diámetros ventriculares normales | No | Sí |
| 11 | Johnson JS *et al.*29,30 | 1998 | 83 | M | No | No | No | Sí |
| 12 | Neuwirth C, *et al.*31 | 1999 | 1 mes | M | No | No | No | Sí |
| 13 | Cox ID *et al.*32 | 2000 | 32 | M | No | Ventrículo izquierdo dilatado con alteración global de la función sistólica. Insuficiencia mitral moderada | Realce tardío en septum y pared lateral | No |
| 14 | Ma M, *et al.*33 | 2007 | 23 | F | No | FEVI 20 %, Hipocinesia ventricular izquierda global | No | Sí |
| 15 | Turpie DF *et al.*34 | 2009 | 45 | M | Normal. Alteración moderada global de la función ventricular izquierda | No | Disminución función ventricular sistólica, realce tardío subepicárdico en pared anteroseptal | No |
| 16 | Hibbert B *et al.*36 | 2010 | 25 | M | Normal | No | Realce tardío de distribución miocárdica y subendocárdica | No |
| 17 | Kratzer C *et al.*37 | 2010 | 19 | M | Normal. Ventriculograma: Área hipoquinética en la región del ápex compatible con miocarditis | FEVI normal, normal | Realce tardío difuso en ventrículo izquierdo hasta tercio medial | No |
| 18 | Heinzl B, *et al.*35 | 2010 | 17 | M | No | FEVI normal, normal | Realce tardío en pared anteroinferior | No |
| 19 | Fica A *et al.*38 | 2012 | 17 | M | No | Normal | Realce segmentario focal del miocardio de ventrículo izquierdo | No |
| 20 | De Cock D *et al.*39 | 2012 | 34 | M | Normal Ventriculograma: FEVI 40 %, hipoquinesia difusa | No | Realce tardío confinado a subepicardio de pared inferolateral | No |
| 21 | De Cock D *et al.*39 | 2012 | 21 | M | No | FEVI 40 %, normal | Edema de pared lateral del ventrículo izquierdo | No |
| 22 | Brice J *et al.*40 | 2013 | 16 | M | No | Normal, FEVI: 68 % | Realce ínferobasal nodular intramiocárdico | No |
| 23 | Panikkath R *et al.*41 | 2014 | 43 | M | Normal | FEVI 68 % Anormalidades segmentarias de la contractibilidad en la porcion inferior del septum | Realce epicárdico y medio miocárdico en pared anterolateral y septum interventricular | No |
| 24 | Villablanca P *et al.*15 | 2015 | 19 | M | No | Disminución de FEVI a 40 % | Captación subepicárdica y en miocardio en región posterior, inferior, anterior | No |
| 25 | Gutiérrez de la Varga *et al.*42 | 2017 | 55 | M | No | FEVI normal, normal | Edema, sin realce tardío | No |
| 26 | Sundbom *et al.*43 | 2018 | 22 | M | No | Disminución de FEVI a 46 % | Edema e inflamación en área inferior e inferolateral | No |
| 27 | Greefield GM *et al.*44 | 2018 | 31 | M | No | FEVI normal, función diastólica normal  Normal | Edema miocárdico localizado y realce en pared inferolateral y basal | No |

**Figura 1**

**
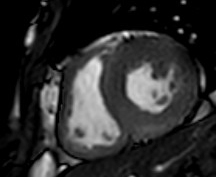

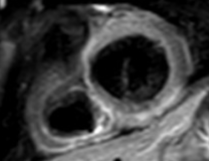

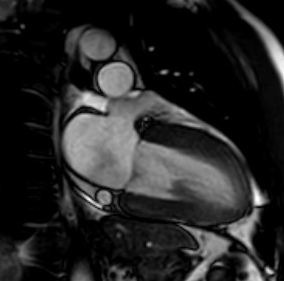
**

Resonancia magnética cardíaca; en la caracterización tisular se observa edema lineal en localización subepicárdica en el segmento inferior e inferolateral. En correlación con esta zona de edema, se observa realce tardío.

**Bibliografía**

1. Sinagra G, Anzini M, Pereira NL, Bussani R, Finocchiaro G, Bartunek J, et al. Myocarditis in clinical practice. Mayo Clin Proc. 2016;91(9):1256-66.

2. Felker GM, Thompson RE, Hare JM, Hruban RH, Clemetson DE, Howard DL, et al. Underlying causes and long-term survival in patients with initially unexplained cardiomyopathy. N Engl J Med. 2000;342(15):1077-84.

3. Dennert R, Crijns HJ, Heymans S. Acute viral myocarditis. Eur Heart J. 2008;29(17):2073-82.

4. Massilamany C, Huber SA, Cunningham MW, Reddy J. Relevance of molecular mimicry in the mediation of infectious myocarditis. J Cardiovasc Transl Res. 2014;7(2):165-71.

5. Maisch B, Pankuweit S. Standard and etiology-directed evidence-based therapies in myocarditis: state of the art and future perspectives. Heart Fail Rev. 2013;18(6):761-95.

6. Haddad F, Berry G, Doyle RL, Martineau P, Leung T-K, Racine N. Active bacterial myocarditis: a case report and review of the literature. J Heart Lung Transplant. 2007;26(7):745-9.

7. Wasi F, Shuter J. Primary bacterial infection of the myocardium. Front Biosci. 2003;8:s228-31.

8. Berry GJ AK. Pathology of human myocarditis. In: Myocarditis: from bench to bedside. 2003. p. 325-70.

9. Friedrich MG, Sechtem U, Schulz-Menger J, Holmvang G, Alakija P, Cooper LT, et al. Cardiovascular magnetic resonance in myocarditis: A JACC White Paper. J Am Coll Cardiol. 2009;53(17):1475-87.

10. Haaf P, Buser PT. Map to the future of cardiac magnetic resonance in myocarditis., Eur Heart J Cardiovasc Imag. 2017;18:752-3.

11. Mahrholdt H, Goedecke C, Wagner A, Meinhardt G, Athanasiadis A, Vogelsberg H, et al. Cardiovascular magnetic resonance assessment of human myocarditis: a comparison to histology and molecular pathology. Circulation. 2004;109(10):1250-8.

12. Fung G, Luo H, Qiu Y, Yang D, McManus B. Myocarditis. Circ Res. 2016;118(3):496-514.

13. Caforio ALP, Pankuweit S, Arbustini E, Basso C, Gimeno-Blanes J, Felix SB, et al. Current state of knowledge on aetiology, diagnosis, management, and therapy of myocarditis: A position statement of the European Society of Cardiology Working Group on Myocardial and Pericardial Diseases. Eur Heart J. 2013;34(33):2636-48.

14. Hibbert B, Costiniuk C, Hibbert R, Joseph P, Alanazi H, Simard T, et al. Cardiovascular complications of Salmonella enteritidis infection. 2010;26(8):323-5.

15. Villablanca P, Mohananey D, Meier G, Yap JE, Chouksey S, Abegunde AT. *Salmonella berta* myocarditis: Case report and systematic review of non-typhoid Salmonella myocarditis. World J Cardiol. 2015;7(12):931-7.

16. Franco-Paredes C, Khan MI, Gonzalez-Diaz E, Santos-Preciado JI, Rodriguez-Morales AJ, Gotuzzo E. Enteric fever: a slow response to an old plague. PLoS Negl Trop Dis. 2016;10(5):e0004597.

17. Walley KR. Sepsis-induced myocardial dysfunction. Curr Opin Crit Care. 2018;24(4):292-9.

18. Narvaez I, Canabal A, Martin C, Sanchez M, Moron A, Alcala J, et al. Incidence and evolution of sepsis-induced cardiomyopathy in a cohort of patients with sepsis and septic shock. Med Intensiva. 2018;42(5):283-91.

19. De Lazzari M, Marra MP, Cacciavillani L, Cucchini U, Rossi S, Iliceto S, et al. Inside myocardial dysfunction in septic shock: mechanism of troponin release highlighted by cardiac magnetic resonance. J Cardiovasc Med (Hagerstown). 2017;18(10):818-9.

20. Martin L, Derwall M, Al Zoubi S, Zechendorf E, Reuter DA, Thiemermann C, et al. The Septic Heart: Current Understanding of Molecular Mechanisms and Clinical Implications. Chest. 2019;155(2):427-37.

21. Hennigar GR, Thabet R, Bundy WE, Sutton LE. Salmonellosis complicated by pancarditis: report of a case with autopsy findings. J Pediatr. 1953;43(5):524-31.

22. Rosenberg HS, Mcnamara DG. Acute myocarditis in infancy and childhood. Prog Cardiovasc Dis. 1964;7:179-97.

23. Sanders V, Misanik LM. Salmonella myocarditis: Report of a case with ventricular rupture. Am Heart J. 2005;68(5):914-6.

24. Langaker OM, Svanes K. Myocardial abscess due to *Salmonella typhimurium*. Br Heart J. 1973;35(8):871-3.

25. Simonsen J, Falk E. A case of sudden cardiac death in connection with *Salmonella* *typhimurium* infection. Forensic Sci Int. 1980;16(3):283-7.

26. Gotz M, Juchems R. Myocarditis caused by *Salmonella typhimurium*. Klin Wochenschr. 1983;61(22):1153-7.

27. Burt CR, Proudfoot JC, Roberts M, Horowitz RH. Fatal myocarditis secondary to salmonella septicemia in a young adult. J Emerg Med. 1990;8(3):295-7.

28. Rubenstein JS, Noah ZL, Zales VR, Shulman ST. Acute myocarditis associated with *Shigella sonnei* gastroenteritis. J Pediatr. 1993;122(1):82-4.

29. Leon F, Badui E, Campos A, Enciso R, Fakih T, Guadarrama M, et al. Cholera and myocarditis--a case report. Angiology. 1997;48(6):545-9.

30. Johnson JS, Croall J, Power JS, Armstrong GR. Fatal *Serratia marcescens* meningitis and myocarditis in a patient with an indwelling urinary catheter. J Clin Pathol. 1998;51(10):789-90.

31. Neuwirth C, Francois C, Laurent N, Pechinot A. Myocarditis due to *Salmonella* *virchow* and sudden infant death. Lancet. 1999:354(9183):1004.

32. Cox ID, Fluck DS, Joy MD. Campylobacter myocarditis; loose bowels and a baggy heart. Eur J Heart Fail. 2001;3(1):105-7.

33. Ma M, Boyd JT, Trinh HT, Coombs JW, Fermann GJ. Fatal myocarditis due to *Clostridium novyi* type B in a previously healthy woman: case report and literature review. Scand J Infect Dis. 2007;39(1):77-80.

34. Turpie DFS, Forbes KJ, Hannah A, Metcalfe MJ, McKenzie H, Small GR. Food-the way to a man’s heart: a mini-case series of *Campylobacter perimyocarditis*. Scand J Infect Dis. 2009;41(6-7):528-31.

35. Heinzl B, Kostenberger M, Nagel B, Sorantin E, Beitzke A, Gamillscheg A. *Campylobacter jejuni* infection associated with myopericarditis in adolescents: report of two cases. Eur J Pediatr. 2010;169(1):63-5.

36. Hibbert B, Costiniuk C, Hibbert R, Joseph P, Alanazi H, Simard T, et al. Cardiovascular complications of *Salmonella enteritidis* infection. Can J Cardiol [Internet]. 2010;26(8):e323-5. Disponible en: http://linkinghub.elsevier.com/retrieve/pii/S0828282X1070444X.

37. Kratzer C, Wolf F, Graninger W, Weissel M. Acute cardiac disease in a young patient with *Campylobacter jejuni* infection: a case report. Wien Klin Wochenschr. 2010;122(9-10):315-9.

38. Fica A, Seelmann D, Porte L, Eugenin D, Gallardo R. A case of myopericarditis associated to *Campylobacter jejuni* infection in the Southern Hemisphere. Brazilian J Infect Dis [Internet]. 2012;16(3):294–6. Disponible en: http://dx.doi.org/10.1016/S1413-8670(12)70327-6.

39. De Cock D, Hiltrop N, Timmermans P, Dymarkowski S, Van Cleemput J. Myocarditis associated with *Campylobacter enteritis*: report of three cases. Circ Heart Fail. 2012;5(2):e19-21.

40. Brice J, Baumard S, Loeb F, Brasme L, Jaussaud R, N’Guyen Y. *Salmonella* *enteritidis* infection complicated by acute myocarditis. Med Mal Infect. 2013;43(6):248-50.

41. Panikkath R, Costilla V, Hoang P, Wood J, Gruden JF, Dietrich B, et al. Chest pain and diarrhea: a case of *Campylobacter jejuni*-associated myocarditis. J Emerg Med. 2014;46(2):180-3.

42. Gutierrez de la Varga L, Rodriguez Suarez ML, Corros Vicente C. Myocarditis associated with *Campylobacter jejuni* infection. Medicina Cílnica. 2017;148:333-4.

43. Sundbom P, Suutari A-M, Abdulhadi K, Broda W, Csegedi M. *Salmonella enteritidis* causing myocarditis in a previously healthy 22-year-old male. Oxford Medical Case Reports. England; 2018(12):106.

44. Greenfield GM, Mailey J, Lyons K, Trouton TG. Acute myocarditis secondary to acute *Campylobacter jejuni* infection. Clin Med. 2018;18(1):98-9.
